# Supplementary material for: Efficiency improvement of Juniper trees mass propagation through in vitro shoot multiplication
Source: PeerJ. 2025 Apr 7;13:e19255. doi: 10.7717/peerj.19255 (PMC11984480; doi:10.7717/peerj.19255)
Supplement: Supplemental Information 1 [file peerj-13-19255-s001.xls]

## Sheet: Starting
Sterilization treatment	Treatments	Rep	Survival rate (%)	Contamination (%)
15 min Clorox 50%+MC at 0.2g/l	1	1	0.1	1
	1	2	0.11	1
	1	3	0.1	1
30 min Clorox 50%+MC at 0.1g/l	2	1	0.2	0.9
	2	2	0.21	0.87
	2	3	0.19	0.93
30 min Clorox 50%+15 min Clorox 30%	3	1	0.5	0.6
	3	2	0.45	0.58
	3	3	0.55	0.61
30 min Clorox 50%+30 min Clorox 30%	4	1	0.8	0.4
	4	2	0.67	0.41
	4	3	0.82	0.38
BA (mg/l)	Treatments	Rep	sprouting percentage	Respondedexplant number	shoot number
	1	1	0.48	1.22	0.9
0	1	2	0.5	1.33	1
	1	3	0.52	1.44	1.1
	2	1	0.63	2.44	1.44
0.5	2	2	0.6	2.33	1.33
	2	3	0.57	2.22	1.22
	3	1	0.68	2.99	1.65
1	3	2	0.7	2.67	1.67
	3	3	0.72	2.32	1.69

## Sheet: Multiplcation
treat	Rep	survival	shoot number	leaf number	shoot length
1	1	0.16	1.25	16.8	1.8
1	2	0.17	1.2	17	1.75
1	3	0.18	1.31	17.2	1.7
2	1	0.68	2.06	11	1.2
2	2	0.66	2	10	1.3
2	3	0.64	2.11	9	1.4
3	1	0.65	2.29	8.3	1.36
3	2	0.66	2.2	8.5	1.34
3	3	0.65	2.11	8.7	1.32
4	1	1	2.82	14.8	1.42
4	2	1	2.7	14.4	1.45
4	3	1	2.9	14	1.47
5	1	0.85	1.02	1	0.7
5	2	0.83	1	3	0.6
5	3	0.81	1.4	5	0.5
6	1	0.6667	1.01	5	1.2
6	2	0.66	1	4.5	1
6	3	0.64	1.02	4	0.8
7	1	0.6667	2.43	6.3	0.7
7	2	0.65	2.33	6.6	0.86
7	3	0.67	2.53	6.9	0.9
8	1	0.16	1.93	2.5	1.2
8	2	0.16	1.88	2	1
8	3	0.15	1.98	1.5	0.81
9	1	0.16	1.12	5.5	0.92
9	2	0.16	1.16	6	1
9	3	0.17	1.08	6.51	1.08
10	1	0.83	1.41	4.38	0.79
10	2	0.8	1.42	4.28	0.77
10	3	0.86	1.4	4.18	0.75

## Sheet: Rooting data
treat	rep	Rooted shoots (%)	Shoot length	Leaf number
1	1	0	3	6
1	2	0	2.9	5.5
1	3	0	3.1	6.5
2	1	0	4.67	9.55
2	2	0	5	9.33
2	3	0	4.24	9.11
3	1	0	5.67	11.11
3	2	0	5.52	11.33
3	3	0	5.72	11.44
4	1	0	4	8.4
4	2	0	3.8	8
4	3	0	4.2	7.6
5	1	0	4	6.1
5	2	0	3.5	6
5	3	0	4.5	5.9
6	1	10	4.67	8.54
6	2	9	4.4	8.67
6	3	11	4.89	8.9
7	1	20	5.67	11.66
7	2	19	5.33	11.33
7	3	21	5.99	11
8	1	10	4.33	5.4
8	2	9	4.11	6
8	3	11	4.55	6.6
